# Supplementary material for: Multi-Fractal Detrended Cross-Correlation Heatmaps for Time Series Analysis
Source: Research Square preprint supplement (doi:10.21203/rs.3.rs-2172772/v1), 2022-10-20
Supplement: Supplementary file [file 5f43cd503991552a21418624.pdf]

# Supporting Information

## Multi-Fractal Detrended Cross-Correlation Heatmaps for Time Series Analysis

**Paulo Roberto Barros de Melo Junior** [1], **Kianny Lopes Bunge** [2], **Vitor Hugo Serravalle Reis Rodrigues** [3], **Michell Thompson Ferreira Santiago** [4], **Euler Bentes dos Santos Marinho** [4], and **Jose Luis Lima de Jesus Silva** [5,+,\*]

1. **Petrobras, Petróleo Brasileiro S.A.**, Av. República do Chile, nº 65 Centros, Rio de Janeiro, 20031-912, Brasil
2. **UnifAMEC**, Avenida Leste, Ponto Certo, Camacari-BA, 42801-170, Brazil
3. **Geological Survey of Brasil - CPRM**, Avenida Ulysses Guimarães, 2862 Centro Administrativo da Bahia, Salvador-BA, 1649-026, Brazil
4. **Federal University of Bahia, Polytechnic School of Engineering and Institute of Geosciences, Research Center in Geophysics and Geosciences**, Rua Barão de Jeremoabo, Ondina, Salvador-BA, 40210-630, Brazil
5. **Linköping University**, Department of Computer and Information Science, Division of Artificial Intelligence and Integrated Computer Systems, Linköping, SE-581 83, Sweden

**Corresponding author:** \* [jose.silva@liu.se](mailto:jose.silva@liu.se)

**Data Availability:** + The datasets generated during and/or analysed during the current study are available from the corresponding author on reasonable request.

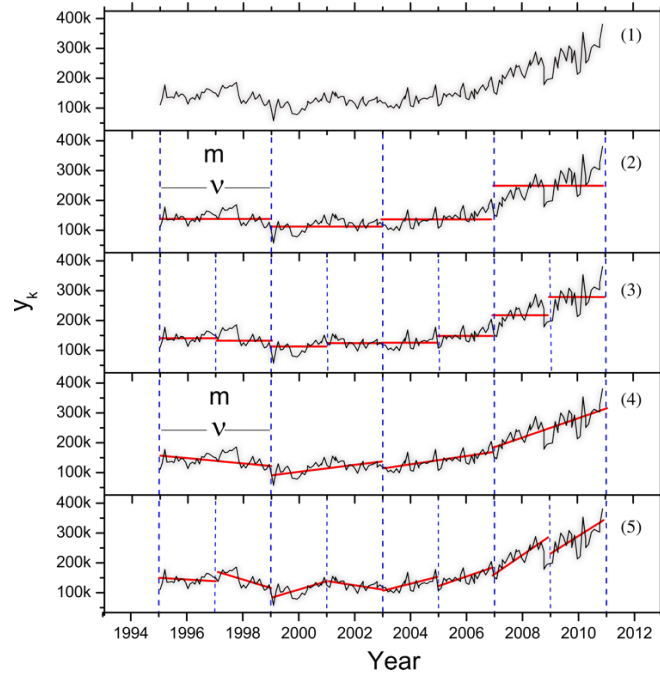

**Figure S1:** Illustrative steps for Autocorrelation. (1) Time Series of sales  $y_k$  in units (Brazilian Automotive Sector), (2) Average (red) of Time series for four windows  $m$  of size  $v$ , and (3) eight windows. (4) First-order adjustment considering four and (5) eight windows, respectively.

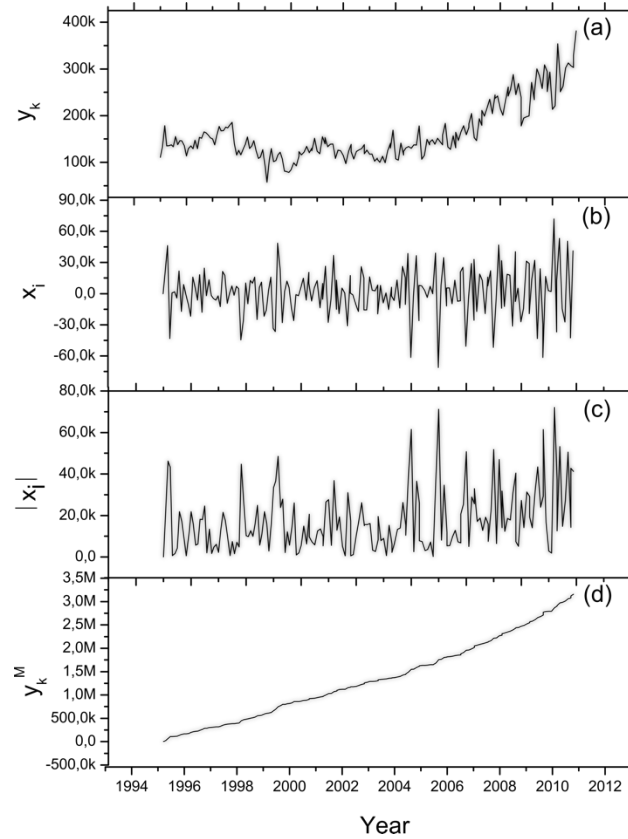

**Figure S2:** (a) Time series of sales  $y_k$ . (b) Time series of successive differences  $y_k$ , where  $x_i = y_{k+1} - y_k$ . (c) Series of magnitudes for successive differences  $x_i$ , and (d) Integrated series of magnitudes with  $y_k^M = \sum_{i=1}^k |x_i|$ .

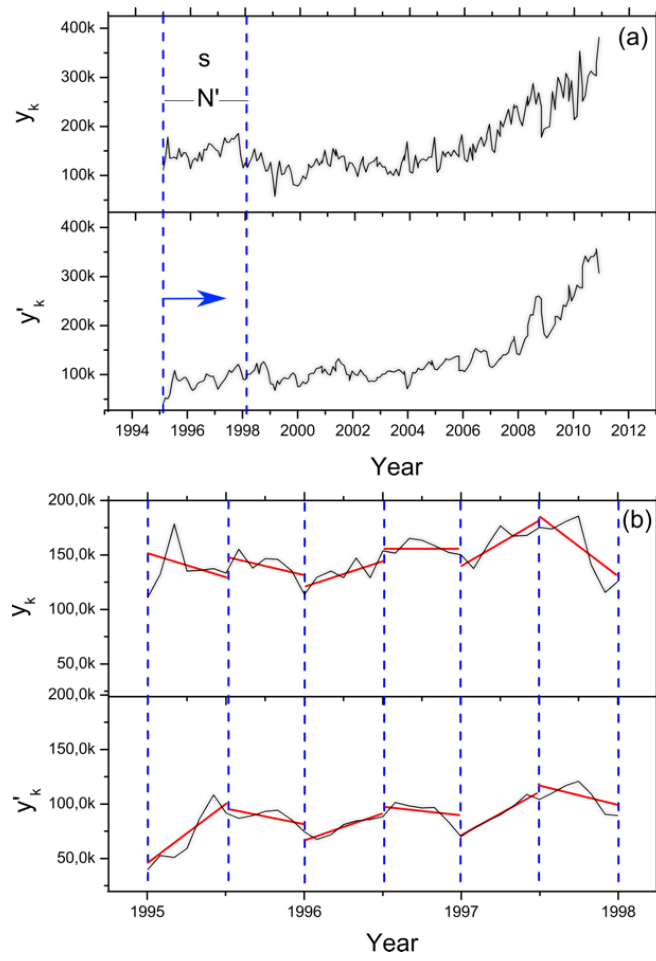

**Figure S3:** (a) Illustration of the local analysis procedure for sliding boxes of size  $N$ . (b) Expansion of the box  $s$  divided into six periods  $m$  of size  $v$ .
